# Supplementary material for: Genetically engineered distal airway stem cell transplantation protects mice from pulmonary infection
Source: PubMed Central journal article supplement (PMC6949487; doi:10.15252/emmm.201810233), 2019-11-29
Supplement: EMMM-12-e10233-s001.pdf [file EMMM-12-e10233-s001.pdf]

# Genetically engineered distal airway stem cell transplantation protects mice from pulmonary infection

Yue-qing Zhou, Yun Shi, Ling Yang, Yu-fen Sun, Yu-fei Han, Zi-xian Zhao, Yu-jia Wang, Ying Liu, Yu Ma, Ting Zhang, Tao Ren, Tina P. Dale, Nicholas R. Forsyth, Fa-guang Jin, Jie-ming Qu, Wei Zuo, Jin-fu Xu

## **Appendix**

Appendix Table S1

Appendix Table S1: Statistics.

| Figure   | p-Value                                                                                                                                                   | n          |
|----------|-----------------------------------------------------------------------------------------------------------------------------------------------------------|------------|
| Fig 1C   | 0.0033(Top pannel) ; 0.4231(Down pannel)                                                                                                                  | 3          |
| Fig 1D   | >0.9999(0h);<0.0001(6h); 0.0094(24h);                                                                                                                     | 3          |
| Fig 1F   | > 0.9999(0h); 0.0204(6h);                                                                                                                                 | 3          |
| Fig 1G   | IL-1 $\beta$ : 0.0002(6h); 0.0356(24h)<br>IL-6: < 0.0001(6h);                                                                                             | n $\geq$ 3 |
| Fig 3B   | <0.0001                                                                                                                                                   | 10         |
| Fig 3E   | P0-P5: 0.9978; 0.9990; > 0.9999; > 0.9999; > 0.9999                                                                                                       | 6          |
| Fig 3G   | 0.3038(MOI=1); 0.0023(MOI=5); 0.0028(MOI=10)                                                                                                              | 4          |
| Fig 3H   | < 0.0001(18h)                                                                                                                                             | 3          |
| Fig 3I   | < 0.0001 (column C-D) ; 0.0018 (columnD-E)                                                                                                                | 4          |
| Fig 3J   | < 0.0001 (column C-D) ; 0.0252 (columnD-E)                                                                                                                | 3          |
| Fig 4B   | 0.0474(WT-lung, 7d vs 21d)                                                                                                                                | 3          |
| Fig 5B   | <0.0001(6h); <0.0001(24h);<0.0001(48h)                                                                                                                    | 3          |
| Fig 5C   | <0.0001(6h)                                                                                                                                               | 3          |
| Fig 5F   | 0.0415(PCO2); 0.0027(SO2); 0.0006(PO2)                                                                                                                    | 6          |
| Fig 6B   | 0.0002(column C-E) ; 0.0064(column D-E)                                                                                                                   | 5          |
| Fig 6D   | <0.0001(column C-E) ; 0.0004(column D-E)                                                                                                                  | 5          |
| Fig 6E   | IL-6: < 0.0001 (column B-C); < 0.0001(column B-D)<br>IL-1b: 0.0013 (column B-C) ; 0.0002(column B-D)<br>TNF-a: 0.0003 (column B-C) ; < 0.0001(column B-D) | 3          |
| Fig 7B   | <0.0001                                                                                                                                                   | 5          |
| Fig 7G   | PAO1: 0.0002(column B-C) ; <0.0001(columnC-D)<br>E.coli: 0.8607(column B-C) ; 0.0131(columnC-D)                                                           | 6          |
| Fig EV1C | 0.0206(column C-D)                                                                                                                                        | 5          |
| Fig EV1D | 0.0003(column C-D)                                                                                                                                        | 3          |
| Fig EV1F | 0.0443(column C-D)                                                                                                                                        | 3          |
| Fig EV2E | 0.0011(Lung); 0.0287(BALF);                                                                                                                               | 3          |
| Fig EV2F | 0.0075(PpO2); 0.0301(So2); 0.1859(PCO2)                                                                                                                   | 3          |
