# Supplementary material for: Genetically engineered distal airway stem cell transplantation protects mice from pulmonary infection
Source: PubMed Central journal article supplement (PMC6949487; doi:10.15252/emmm.201810233), 2019-11-29
Supplement: EMMM-12-e10233-s002.pdf [file EMMM-12-e10233-s002.pdf]

## Expanded View Figures

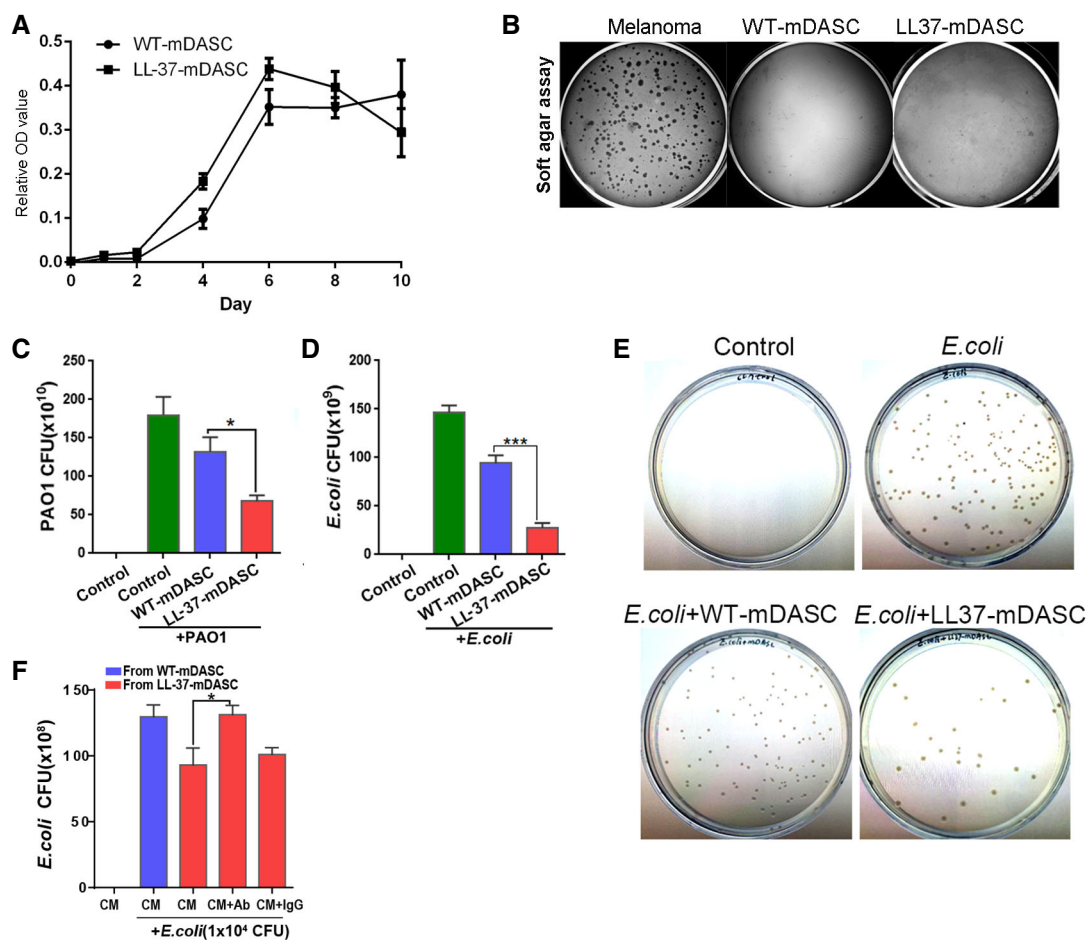

**Figure EV1. The antimicrobial effect of LL-37-mDASCs *in vitro*.**

A Cell growth curve of WT- and LL-37-mDASCs was measured by MTT assay.  $n = 3-5$ . Error bars, SD.

B Soft agar assay of WT- and LL-37-mDASCs. Mouse melanoma cell line was included as a positive control.

C Histogram showed that LL-37-mDASCs conditioned medium (CM) had potent growth inhibitory effect on PAO1. Initial addition of PAO1 was  $1 \times 10^4$  CFU.  $n = 5$ . Error bars, SEM.

D Histogram shows that LL-37-mDASCs CM had potent growth inhibitory effect on *Escherichia coli*. Initial addition of *E. coli* was  $1 \times 10^4$  CFU.  $n = 3$ . Error bars, SEM.

E Clone formation unit assay of *E. coli* following incubation with indicated cellular CM.

F Preincubation of CM with anti-LL-37 antibody, but not mouse IgG, reduced the antimicrobial effect of LL-37-mDASCs against *E. coli*.  $n = 3$ . Error bars, SEM.

Data information: Statistics for graphs: one-way ANOVA followed by Tukey's test. \* $P < 0.05$ ; \*\*\* $P < 0.001$ .

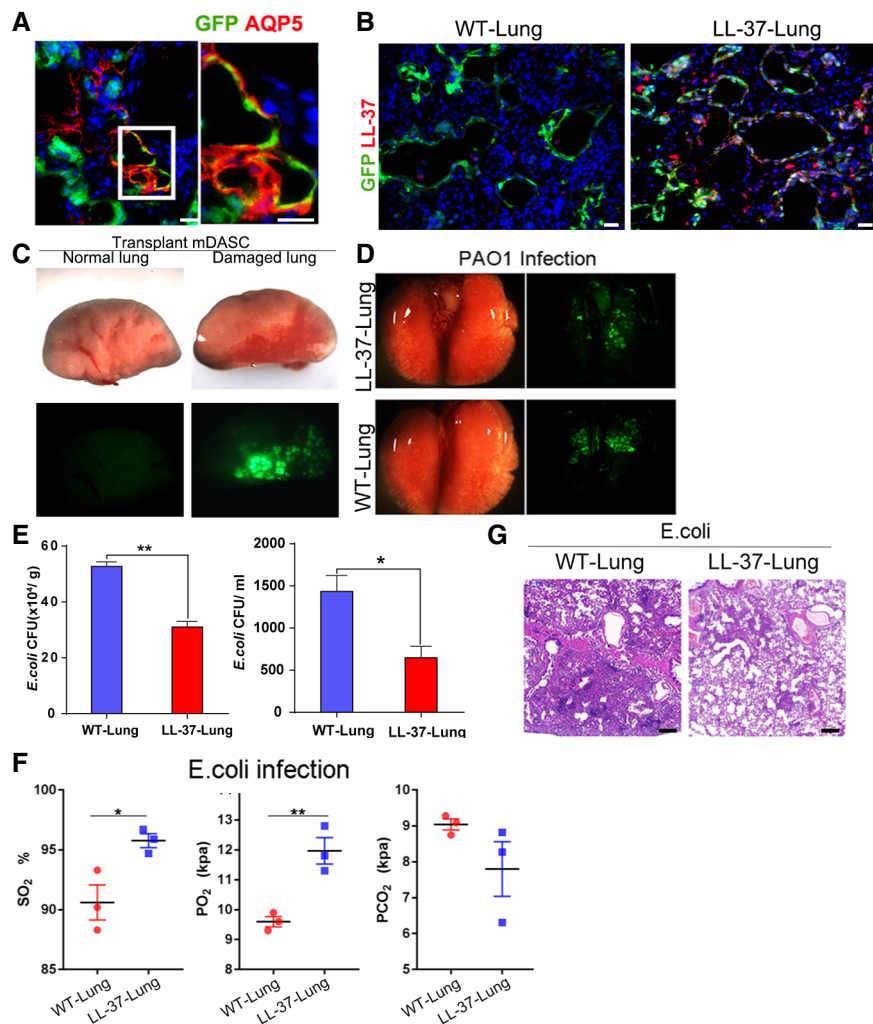

**Figure EV2. The antimicrobial effect of LL-37-Lung.**

**A** Left, immunostaining of engrafted LL-37-mDASCs cells with anti-GFP and anti-AQP5 (type I alveolar cell marker) antibodies; right, amplification of inset in upper panel indicated regenerated alveolar structure. Scale bar, 30  $\mu$ m.

**B** Distribution of engrafted GFP-labeled cells in lung parenchyma by immunostaining 21 days after transplantation. WT-Lung, WT-mDASCs engrafted; LL-37-Lung, LL-37-mDASCs engrafted. Scale bar, 40  $\mu$ m.

**C** Direct fluorescence image of lungs from normal mouse or bleomycin injured mouse 7 days after transplantation of  $1 \times 10^6$  GFP-labeled mDASCs.

**D** Direct fluorescence image under stereomicroscope showing mouse lung transplanted with  $1 \times 10^6$  GFP-labeled WT- and LL-37-mDASCs followed by PAO1 infection.

**E** Intratracheal instillation of equal amounts of *E. coli* ( $5 \times 10^6$  CFU per mouse) into WT-Lung (WT-mDASCs engrafted) and LL-37-Lung (LL-37-mDASCs engrafted) followed by bacterial CFU analysis in whole lung homogenates (left panel) and BALF (right panel) 2 days after infection.  $n = 3$ . Error bars, SEM.

**F** Arterial blood gas analysis of mice with WT-Lung and LL-37-Lung following *E. coli* infection 2 days after transplantation.  $n = 3$ . Error bars, SEM.

**G** H&E staining showing histology of WT-Lung and LL-37-Lung with *E. coli* infection after 2 days of cell transplantation. Scale bar, 200  $\mu$ m.

Data information: Statistics for graphs: unpaired two-tailed *t*-test. \* $P < 0.05$ ; \*\* $P < 0.01$ .

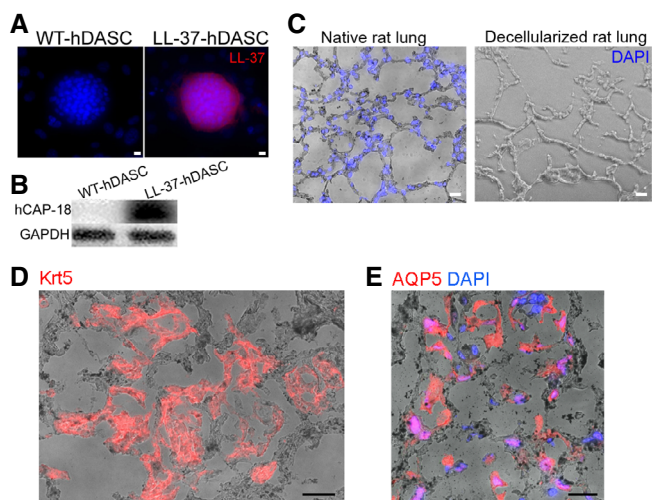

**Figure EV3. Lung scaffold recellularized by engineered human DASCs.**

**A, B** The expression of LL-37 in engineered human DASC (hDASCs) was detected by immunostaining (A) and Western blot (B). Scale bar, 20  $\mu$ m.

**C** Cryosections of native and decellularized rat lung with nuclei counterstain. Blue color indicates nucleus DAPI staining Scale bar, 50  $\mu$ m.

**D** Immunofluorescence staining showed that major cells preserved KRT5 + hDASCs phenotype (red). Scale bar, 50  $\mu$ m.

**E** Immunofluorescence staining showed that a few grafted cells of elongated shape had AQP5 (type I alveolar cell marker) expression. Scale bar, 50  $\mu$ m.
